# Supplementary material
Source: PubMed Central journal article supplement (PMC8492160)
Supplement: NIHMS1573552-supplement-216_2020_2485_MOESM1_ESM.pdf [file NIHMS1573552-supplement-216_2020_2485_MOESM1_ESM.pdf]

**Analytical and Bioanalytical Chemistry**

**Electronic Supplementary Material**

**High-throughput fluorescence correlation spectroscopy enables analysis  
of surface components of cell-derived vesicles**

Xu Fu, Yongwook Song, Abdullah Masud, Kanthi Nuti, Jason E. DeRouchey,  
Christopher I. Richards

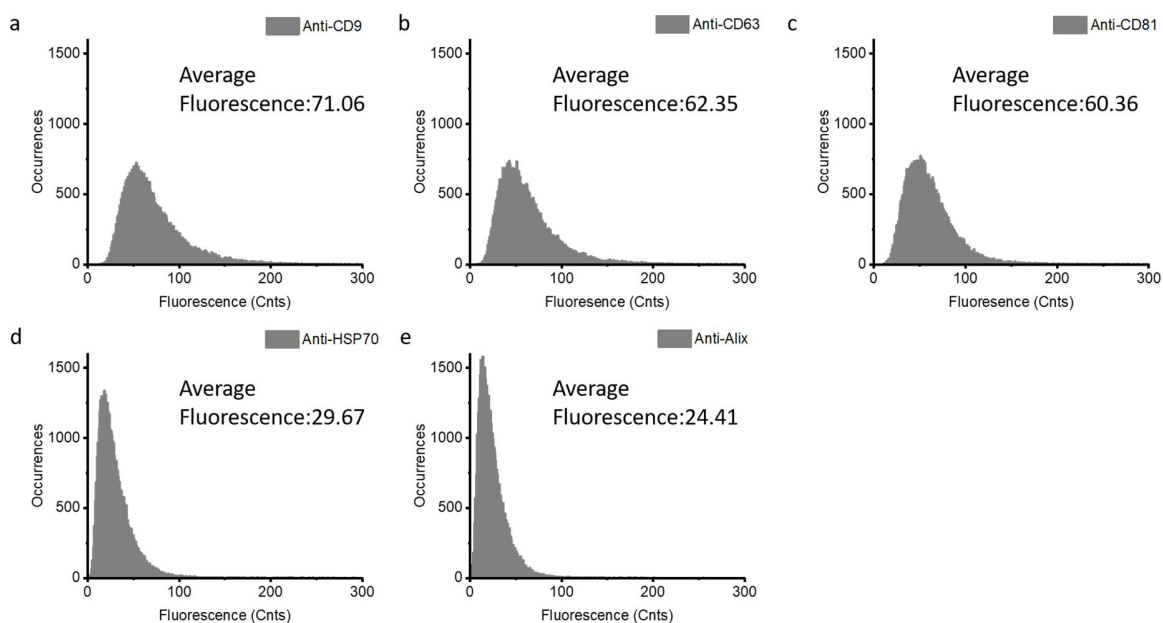

**Fig. S1** Calculated mean fluorescence intensity of free antibodies from anti-CD9-CF543 antibody (a), anti-CD63-CF543 antibody (b), anti-CD81-CF543 antibody (c), anti-HSP70-CF543 antibody (d), and anti-Alix-CF543 antibody (e)

**Table S1** The comparison of different methods used in the studies of vesicle characterization

| FEATURE                   | HT-FCS                    | FLOW CYTOMETRY            | WESTERN BLOT           | MASS SPECTROSCOPY            |
|---------------------------|---------------------------|---------------------------|------------------------|------------------------------|
| WHAT IS MEASURED          | Fluorescence fluctuations | Enhanced forward scatter  | Immunoblotting         | Mass-to-charge ratio of ions |
| PARTICLE SIZE             | Yes                       | Yes                       | No                     | No                           |
| CONCENTRATION             | Yes                       | Absolute number           | Relative concentration | No                           |
| PROTEIN COMPOSITION       | Yes (with surface marker) | Yes (with surface marker) | Yes                    | Yes                          |
| SINGLE PARTICLE DETECTION | Yes                       | Yes                       | No                     | No                           |

**Table S2** Antibody binding analysis among 4 different cell-derived vesicles

|                                                    | A549 |     |     |     | HEK293T |     |     |     |     |     | N2A |     |     |     | Raw 264.7 |     |     |     |     |     |
|----------------------------------------------------|------|-----|-----|-----|---------|-----|-----|-----|-----|-----|-----|-----|-----|-----|-----------|-----|-----|-----|-----|-----|
| Diffusion Coefficient ( $\mu\text{m}^2/\text{s}$ ) | 1.2  | 1.2 | 8.9 | 16  | 1.9     | 0.8 | 1.6 | 1.1 | 14  | 2   | 14  | 16  | 16  | 10  | 6.1       | 12  | 18  | 15  | 10  | 0.8 |
| Average bound antibodies                           | 2.1  | 1.9 | n/a | n/a | 2.1     | 2.5 | 1.8 | 1.3 | n/a | 2.6 | n/a | n/a | n/a | n/a | 1.6       | n/a | n/a | n/a | n/a | 3.9 |
| Diffusion Time (ms)                                | 23   | 23  | 3   | 1.7 | 14      | 34  | 17  | 24  | 1.9 | 15  | 1.9 | 1.7 | 1.7 | 2.2 | 4.6       | 2.3 | 1.5 | 1.8 | 2.2 | 34  |
| Binding                                            | ✓    | ✓   |     |     | ✓       | ✓   | ✓   | ✓   |     | ✓   |     |     |     |     | ✓         |     |     |     |     | ✓   |
